# Supplementary material
Source: PubMed Central journal article supplement (PMC6080695)
Supplement: NIHMS78556-supplement-Supplementary_tables.pdf [file NIHMS78556-supplement-Supplementary_tables.pdf]

**Supplementary Table 1 - ChIP-seq experiments**

|                                                          | GEO accession ID | Experiment ID             | # of peaks | Single ChIP-specific (#) | Common (#) | Common (%) | Merged replica ChIPs |
|----------------------------------------------------------|------------------|---------------------------|------------|--------------------------|------------|------------|----------------------|
| Stag1 ChIP in wild-type                                  | GSM1979724       | 14549                     | 27168      | 7595                     | 19560      | 72%        | 27072                |
|                                                          | GSM1979725       | 14954                     | 20741      | 790                      |            | 96%        |                      |
| Stag1 ChIP in <i>Ctcf</i> KO                             | GSM1979726       | 14551                     | 31487      | 6927                     | 12533      | 64%        | 39292                |
|                                                          | GSM1979727       | 19587                     | 23380      | 1584                     |            | 89%        |                      |
|                                                          | GSM1979728       | 26233                     | 39320      | 16001                    |            | 44%        |                      |
| Stag1 ChIP in <i>Smc3</i> KO                             | GSM1979729       | 19588                     | 1487       | 116                      | 1143       | 91%        | 5898                 |
|                                                          | GSM1979730       | 26234                     | 6007       | 3200                     |            | 26%        |                      |
|                                                          | GSM1979731       | 27235                     | 2956       | 349                      |            | 77%        |                      |
| Stag1 ChIP in <i>Wapl</i> KO                             | GSM1979732       | 19589                     | 18659      | 1111                     | 14775      | 93%        | 29418                |
|                                                          | GSM1979733       | 20318                     | 19938      | 738                      |            | 95%        |                      |
|                                                          | GSM1979734       | 26235                     | 31193      | 10270                    |            | 59%        |                      |
| Stag1 ChIP in <i>Ctcf Wapl</i> DKO                       | GSM1979735       | 26236                     | n.a.       | ---                      | ---        | ---        | ---                  |
|                                                          | GSM1979736       | 27237                     | n.a.       | ---                      | ---        | ---        | ---                  |
| Scc1 ChIP in wild-type                                   | GSM1979737       | 20093                     | 19125      | 2463                     | 16547      | 87%        | 22702                |
|                                                          | GSM1979738       | 20105                     | 19581      | 2883                     |            | 85%        |                      |
| Scc1 ChIP in <i>Ctcf</i> KO                              | GSM1979739       | 20094                     | 26670      | 16572                    | 7777       | 32%        | 39433                |
|                                                          | GSM1979740       | 20106                     | 37649      | 29818                    |            | 21%        |                      |
|                                                          | GSM2221806       | 27715                     | 11790      | 3501                     |            | 69%        |                      |
|                                                          | GSM1979741       | 20095                     | 1265       | 61                       |            | 91%        |                      |
| Scc1 ChIP in <i>Smc3</i> KO                              | GSM1979742       | 20319                     | 4917       | 3208                     | 635        | 17%        | 5003                 |
|                                                          | GSM1979743       | 27716                     | 1577       | 442                      |            | 59%        |                      |
|                                                          | GSM1979744       | 20096                     | 16112      | 313                      |            | 98%        |                      |
| Scc1 ChIP in <i>Wapl</i> KO                              | GSM1979745       | 20320                     | 18728      | 534                      | 13227      | 96%        | 28162                |
|                                                          | GSM1979746       | 27717                     | 31547      | 12746                    |            | 51%        |                      |
|                                                          | GSM1979747       | 26238                     | n.a.       | ---                      |            | ---        |                      |
| Scc1 ChIP in <i>Ctcf Wapl</i> KO                         | GSM1979748       | 27718                     | n.a.       | ---                      | ---        | ---        | ---                  |
|                                                          |                  |                           |            |                          |            |            |                      |
| Cohesin sites in wild-type                               | ---              | Scc1 (wt)                 | 22702      | 1293                     | 20889      | 94%        | 28335                |
|                                                          | ---              | Stag1 (wt)                | 27072      | 6156                     |            | 77%        |                      |
| Cohesin sites in <i>Ctcf</i> KO                          | ---              | Scc1 ( <i>Ctcf</i> KO)    | 39433      | 7911                     | 30181      | 79%        | 46915                |
|                                                          | ---              | Stag1 ( <i>Ctcf</i> KO)   | 39292      | 8785                     |            | 77%        |                      |
| Cohesin sites in <i>Smc3</i> KO                          | ---              | Scc1 ( <i>Smc3</i> KO)    | 5003       | 986                      | 4006       | 80%        | 6883                 |
|                                                          | ---              | Stag1 ( <i>Smc3</i> KO)   | 5898       | 1881                     |            | 68%        |                      |
| Cohesin sites in <i>Wapl</i> KO                          | ---              | Scc1 ( <i>Wapl</i> KO)    | 29418      | 2823                     | 25093      | 90%        | 31602                |
|                                                          | ---              | Stag1 ( <i>Wapl</i> KO)   | 28162      | 3688                     |            | 87%        |                      |
| Scc1 ChIP in <i>Ctcf Wapl</i> DKO + 6h serum             | GSM1979749       | 29071                     | n.a.       | ---                      | ---        | ---        | ---                  |
| Scc1 ChIP in <i>Ctcf Wapl</i> DKO + 2.5h ActD            | GSM1979750       | 29072                     | n.a.       | ---                      | ---        | ---        | ---                  |
| Scc1 ChIP in <i>Ctcf Wapl</i> DKO + 5h ActD              | GSM1979751       | 29073                     | n.a.       | ---                      | ---        | ---        | ---                  |
| Scc1 ChIP in <i>Ctcf Wapl</i> DKO - day 0                | GSM1979752       | 29074                     | n.a.       | ---                      | ---        | ---        | ---                  |
| Scc1 ChIP in <i>Ctcf Wapl</i> DKO - day 2                | GSM1979753       | 29075                     | n.a.       | ---                      | ---        | ---        | ---                  |
| Scc1 ChIP in <i>Ctcf Wapl</i> DKO - day 4                | GSM1979754       | 29076                     | n.a.       | ---                      | ---        | ---        | ---                  |
| Scc1 ChIP in <i>Ctcf Wapl</i> DKO - day 6                | GSM1979755       | 29077                     | n.a.       | ---                      | ---        | ---        | ---                  |
| Scc1 ChIP in <i>Ctcf Wapl</i> DKO - day 8                | GSM1979756       | 29078                     | n.a.       | ---                      | ---        | ---        | ---                  |
| Scc1 ChIP in <i>Ctcf Wapl</i> DKO - day 10               | GSM1979757       | 29079                     | n.a.       | ---                      | ---        | ---        | ---                  |
| Scc1 ChIP in <i>Ctcf Wapl</i> DKO - DRB                  | GSM1979758       | 32721                     | n.a.       | ---                      | ---        | ---        | ---                  |
| Scc1 ChIP in <i>Ctcf Wapl</i> DKO + DRB                  | GSM1979759       | 32722                     | n.a.       | ---                      | ---        | ---        | ---                  |
| Scc1 ChIP in <i>Ctcf Wapl</i> DKO + DRB + 30 min washout | GSM1979760       | 32723                     | n.a.       | ---                      | ---        | ---        | ---                  |
| Scc1 ChIP in <i>Ctcf Wapl</i> DKO + DRB + 1 day washout  | GSM1979761       | 32724                     | n.a.       | ---                      | ---        | ---        | ---                  |
| H3K4me2 in wild-type                                     | GSM1979762       | 16816                     | 39536      | 4409                     | 34701      | 89%        | 58221                |
|                                                          | GSM1979763       | 18867                     | 57332      | 19761                    |            | 64%        |                      |
| H3K4me2 in <i>Ctcf</i> KO                                | GSM1979764       | 16820                     | 37290      | 1124                     | 33671      | 97%        | 56011                |
|                                                          | GSM1979765       | 18868                     | 53818      | 19996                    |            | 63%        |                      |
| H3K4me2 in <i>Smc3</i> KO                                | GSM1979766       | 16826                     | 33271      | 1444                     | 30671      | 96%        | 57386                |
|                                                          | GSM1979767       | 18869                     | 61807      | 30207                    |            | 50%        |                      |
| H3K4me2 in <i>Wapl</i> KO                                | GSM1979768       | 16828                     | 44824      | 513                      | 42295      | 99%        | 72240                |
|                                                          | GSM1979769       | 18870                     | 73665      | 30944                    |            | 58%        |                      |
| H3K9ac in wild-type                                      | GSM1979770       | 16818                     | 24765      | 4066                     | 20387      | 83%        | 35234                |
|                                                          | GSM1979771       | 18871                     | 27110      | 5247                     |            | 80%        |                      |
| H3K9ac in <i>Ctcf</i> KO                                 | GSM1979772       | 16822                     | 23822      | 6561                     | 16663      | 72%        | 26880                |
|                                                          | GSM1979773       | 18872                     | 17565      | 609                      |            | 96%        |                      |
| H3K9ac in <i>Smc3</i> KO                                 | GSM1979774       | 16824                     | 20112      | 2827                     | 17038      | 86%        | 28371                |
|                                                          | GSM1979775       | 18873                     | 21099      | 3327                     |            | 84%        |                      |
| H3K9ac in <i>Wapl</i> KO                                 | GSM1979776       | 16830                     | 21242      | 4254                     | 16765      | 80%        | 32714                |
|                                                          | GSM1979777       | 18874                     | 19967      | 2558                     |            | 87%        |                      |
| open chromatin in wild-type                              | ---              | H3K4me2 (wt)              | 58221      | 31495                    | 26064      | 45%        | 65405                |
|                                                          | ---              | H3K9ac (wt)               | 35234      | 7848                     |            | 77%        |                      |
| open chromatin ChIP in <i>Ctcf</i> KO                    | ---              | H3K4me2 ( <i>Ctcf</i> KO) | 56011      | 32293                    | 23556      | 42%        | 57243                |
|                                                          | ---              | H3K9ac ( <i>Ctcf</i> KO)  | 26880      | 1395                     |            | 94%        |                      |
| open chromatin ChIP in <i>Smc3</i> KO                    | ---              | H3K4me2 ( <i>Smc3</i> KO) | 57386      | 34830                    | 22229      | 39%        | 61797                |
|                                                          | ---              | H3K9ac ( <i>Smc3</i> KO)  | 28371      | 4739                     |            | 82%        |                      |
| open chromatin ChIP in <i>Wapl</i> KO                    | ---              | H3K4me2 ( <i>Wapl</i> KO) | 72240      | 50218                    | 21823      | 30%        | 75441                |
|                                                          | ---              | H3K9ac ( <i>Wapl</i> KO)  | 26893      | 3400                     |            | 87%        |                      |
| CTCF ChIP in wild-type                                   | GSM1979778       | 9147                      | 31648      | 1232                     | 30297      | 96%        | 51694                |
|                                                          | GSM1979779       | 27719                     | 52193      | 21695                    |            | 58%        |                      |
| CTCF ChIP in <i>Ctcf</i> KO                              | GSM1979780       | 19593                     | 11245      | ---                      | ---        | ---        | ---                  |
| CTCF ChIP in <i>Smc3</i> KO                              | GSM1979781       | 12156                     | 49609      | 6870                     | 42731      | 86%        | 49609                |
|                                                          | GSM1979782       | 27721                     | 44803      | 1518                     |            | 97%        |                      |
| CTCF ChIP in <i>Wapl</i> KO                              | GSM1979783       | 9149                      | 35841      | 989                      | 34633      | 97%        | 57866                |
|                                                          | GSM1979784       | 27722                     | 58211      | 23062                    |            | 60%        |                      |
| Nipbl ChIP in 3T3 cells                                  | GSM1979785       | 22603                     | 28830      | ---                      | ---        | ---        | ---                  |
| Wapl ChIP in 3T3 cells                                   | GSM2430399       | 22604                     | 12463      | ---                      | ---        | ---        | ---                  |

## Supplementary Table 2 - RNA-seq and GRO-seq experiments

### I. RNA-seq experiments

| GEO accession number | Experiment ID | Abb          | Genotype                   | Active Cre | Culturing        |
|----------------------|---------------|--------------|----------------------------|------------|------------------|
| GSM1979794           | 12525         | Wild-type    | C57BL/6                    | ---        | 10 d             |
| GSM1979795           | 12526         |              |                            | Adeno-Cre  |                  |
| GSM1979796           | 12527         |              |                            | ---        |                  |
| GSM1979797           | 12528         |              |                            | Adeno-Cre  |                  |
| GSM1979798           | 12529         | Wild-type    | R26 (CreER/+)              | ---        | 10 d             |
| GSM1979799           | 12530         |              |                            | OHT        |                  |
| GSM1979800           | 12531         |              |                            | ---        |                  |
| GSM1979801           | 12532         |              |                            | OHT        |                  |
| GSM1979802           | 11647         | Ctcf KO      | Ctcf (fl/fl)               | ---        | 10 d             |
| GSM1979803           | 11649         |              |                            | Adeno-Cre  |                  |
| GSM1979804           | 12535         |              |                            | ---        |                  |
| GSM1979805           | 12536         |              |                            | Adeno-Cre  |                  |
| GSM1979806           | 9611          | Smc3 KO      | R26 (CreER/+) Smc3 (fl/fl) | ---        | 10 d             |
| GSM1979807           | 9612          |              |                            | OHT        |                  |
| GSM1979808           | 10502         |              | ---                        |            |                  |
| GSM1979809           | 10503         |              | OHT                        |            |                  |
| GSM1979810           | 9930          |              | R26 (CreER/+) Smc3 (fl/-)  | ---        | 15 d             |
| GSM1979811           | 9931          |              |                            | OHT        |                  |
| GSM1979812           | 10504         |              |                            | ---        |                  |
| GSM1979813           | 10505         |              |                            | OHT        |                  |
| GSM1979814           | 9934          | Wapl KO      | R26 (CreER/+) Wapl (fl/-)  | ---        | 10 d             |
| GSM1979815           | 9935          |              |                            | OHT        |                  |
| GSM1979816           | 10506         |              |                            | ---        |                  |
| GSM1979817           | 10507         |              |                            | OHT        |                  |
| GSM1979818           | 28013         | Ctcf Wapl KO | Ctcf (fl/fl) Wapl (fl/fl)  | ---        | 10 d             |
| GSM1979819           | 28014         |              |                            | Adeno-Cre  |                  |
| GSM1979820           | 30255         |              |                            | ---        |                  |
| GSM1979821           | 30256         |              |                            | Adeno-Cre  |                  |
| GSM1979822           | 28018         |              |                            | Adeno-Cre  |                  |
|                      |               |              |                            |            | 10 d; +6 h serum |

### II. GRO-seq experiments

| GEO accession number | Experiment ID | Abb          | Genotype                  | Active Cre | Culturing                     |
|----------------------|---------------|--------------|---------------------------|------------|-------------------------------|
| GSM1979786           | 17593         | Wild-type    | R26 (CreER/+)             | ---        | 10 d                          |
| GSM1979787           | 17594         |              |                           | OHT        |                               |
| GSM1979788           | 20107         |              | C57BL/6                   | ---        | 10 d                          |
| GSM1979789           | 20108         |              |                           | Adeno-Cre  |                               |
| GSM1979790           | 30250         | Ctcf Wapl KO | Ctcf (fl/fl) Wapl (fl/fl) | ---        | 10 d                          |
| GSM1979791           | 30251         |              |                           | Adeno-Cre  |                               |
| GSM1979792           | 30252         |              |                           | ---        |                               |
| GSM1979793           | 30253         |              |                           | Adeno-Cre  | 10 d; +3.5 h DRB              |
| GSM2196441           | 32718         |              |                           | Adeno-Cre  |                               |
| GSM2196442           | 32720         |              |                           | Adeno-Cre  |                               |
|                      |               |              |                           |            | 10 d; +3.5 h DRB; +1 d no DRB |

## Supplementary Table 3 - Oligonucleotides

### I. Genotyping oligonucleotides

|                                                    | oligonucleotide sequence           | PCR size |
|----------------------------------------------------|------------------------------------|----------|
| <i>Ctcf</i> (wild-type, floxed and deleted allele) | 5'- CTAGGAGTGTAGTTCAGTGAGGCC       | -3'      |
|                                                    | 5'- GCTCTAAAGAAGGTTGTGAGTTC        | -3'      |
|                                                    | 5'- GCTTCCTCTTGAAAACACAC           | -3'      |
|                                                    | 5'- TGCTACTAATCTCCACCTCACAG        | -3'      |
| <i>Smc3</i> (wild-type, floxed and deleted allele) | 5'- CAGCCATCTTCGTCCAGAGCAGCGATTGGC | -3'      |
|                                                    | 5'- TGTGTCTATAAACACATGTATGC        | -3'      |
|                                                    | 5'- AAGGCGCATAACGATACCAC           | -3'      |
| <i>Wapl</i> (wild-type, floxed and deleted allele) | 5'- ACTGTTCCAGATAGCCCTGC           | -3'      |
|                                                    | 5'- CCACTGCGGTTTCTGCATTG           | -3'      |
|                                                    | 5'- AACAGTTGTGAGCCACTACC           | -3'      |
| CreER insertion in <i>Rosa26</i> locus             | 5'- GCGAAGAGTTTGTCCCTCAACC         | -3'      |
|                                                    | 5'- GGAGCGGAGAAATGGATATG           | -3'      |
|                                                    | 5'- AAAGTCGCTCTGAGTTGTTAT          | -3'      |
| Actin-Flipase                                      | 5'- GGTCCAACCTGCAGCCCAAGCTTCC      | -3'      |
|                                                    | 5'- GTGGATCGATCTACCCCTTGCG         | -3'      |

### II. ChIP-qPCR oligonucleotides

|                    |                            |     |
|--------------------|----------------------------|-----|
| Chr6 negative site | 5'- TGCAGGTGGGATTAAGTGTG   | -3' |
|                    | 5'- CTACCCACCCCTATTCTCC    | -3' |
| <i>Runx1</i>       | 5'- AGGCCTTGTCTGAAGTTTGG   | -3' |
|                    | 5'- CCTCCAGGTGAGACTGATCC   | -3' |
| <i>Myc</i>         | 5'- GGGATCCTGAGTCGAGTATAA  | -3' |
|                    | 5'- CACTCCAGAGCTGCCTTCTTAG | -3' |
| Cohesin island-1   | 5'- TGGCCCTGGTAAGTTTTGAC   | -3' |
|                    | 5'- TCCAGCTTGCAACAGAATTG   | -3' |
| Cohesin island-2   | 5'- TGCATCTCTTGTCTCACGG    | -3' |
|                    | 5'- GCCACAAGAAAAGCTCTGG    | -3' |
| <i>Bzw1</i>        | 5'- TTTAGGGTGGGACAGAGACG   | -3' |
|                    | 5'- GCGAAGAGAAAAGAGCCAGA   | -3' |
| <i>Pabpc1</i>      | 5'- AAAGAGCGTTAACCCGTCAG   | -3' |
|                    | 5'- GGTAGGAGAACGAGGCAGTT   | -3' |
| CTCF site 1        | 5'- TCCATCAAGTTCAGAGCAGGTA | -3' |
|                    | 5'- GCAGCATACGCTTACGTTACAG | -3' |
| TTS                | 5'- GGTTAGGAACGGGTTAACTTT  | -3' |
|                    | 5'- GTCTTGACTGTTCCATCTTCC  | -3' |

### III. GRO-seq oligonucleotides

|                    |                                                                       |     |
|--------------------|-----------------------------------------------------------------------|-----|
| RT_oligonucleotide | 5'- AGACGTGTGCTCTTCCGATCT                                             | -3' |
| M_fw               | 5'- AATGATACGGCGACCCAGATCTACACTCTTCCCTACACGACGCTCTTCCGATCT            | -3' |
| M1_rev             | 5'- CAAGCAGAAGACGGCATAACGAGATATCACGGTGACTGGAGTTCAGACGTGTGCTCTTCCGATCT | -3' |
| M2_rev             | 5'- CAAGCAGAAGACGGCATAACGAGATCGATGTGTGACTGGAGTTCAGACGTGTGCTCTTCCGATCT | -3' |
| M3_rev             | 5'- CAAGCAGAAGACGGCATAACGAGATTTAGGCCTGACTGGAGTTCAGACGTGTGCTCTTCCGATCT | -3' |
| M4_rev             | 5'- CAAGCAGAAGACGGCATAACGAGATTGACCAGTGACTGGAGTTCAGACGTGTGCTCTTCCGATCT | -3' |
| M5_rev             | 5'- CAAGCAGAAGACGGCATAACGAGATACAGTGACTGGAGTTCAGACGTGTGCTCTTCCGATCT    | -3' |
| M6_rev             | 5'- CAAGCAGAAGACGGCATAACGAGATGCCAATGTGACTGGAGTTCAGACGTGTGCTCTTCCGATCT | -3' |
| M7_rev             | 5'- CAAGCAGAAGACGGCATAACGAGATACTTGAGTGACTGGAGTTCAGACGTGTGCTCTTCCGATCT | -3' |
| M8_rev             | 5'- CAAGCAGAAGACGGCATAACGAGATTAGCTTGTGACTGGAGTTCAGACGTGTGCTCTTCCGATCT | -3' |
| M9_rev             | 5'- CAAGCAGAAGACGGCATAACGAGATGGCTACGTGACTGGAGTTCAGACGTGTGCTCTTCCGATCT | -3' |
| M10_rev            | 5'- CAAGCAGAAGACGGCATAACGAGATCTTGTAGTGACTGGAGTTCAGACGTGTGCTCTTCCGATCT | -3' |
